# Supplementary material for: Revealing the photophysics of fac-[(dppz-12-NO2)Re(CO)3(4-Me2Npy)]+: a picosecond time-resolved IR studyElectronic supplementary information (ESI) available: synthetic procedures, product characterization and brief descripion of ps-TSIR experiments. See http://www.rsc.org/suppdata/cc/b2/b200586g/
Source: Royal Society of Chemistry journal article supplement (doi:10.1039/b200586g), 2002-03-22
Supplement: b200586g.doc [file b200586g.doc]

Supplementary Material (ESI) for Chemical Communications

This journal is © The Royal Society of Chemistry 2002

Supporting Information for “Revealing the Photophysics of *fac*-[(dppz-12-NO2)Re(CO)3(4-Me2Npy)]+ : A Picosecond Time-resolved Infrared Study.”

Joanne Dyera, David C. Grillsa, Pavel Matousekb, Anthony W. Parkerb, Michael Towrieb, Julia A. Weinsteina, Michael W. George*a.

aSchool of Chemistry, University of Nottingham, University Park, Nottingham, NG7 2RD, UK,

bCentral Laser Facility, CLRC Rutherford Appleton Laboratory, Chilton, Didcot, Oxon, OX11 0QX, UK.

**Synthetic Procedures**

The synthetic route adopted for the preparation of *fac*-[(dppz-12-NO2)Re(CO)3(4-Me2Npy)]+[PF6]- can be divided into four steps:

1. **Synthesis of 1,10-phenanthroline-5,6-dione.** The procedure detailed by Yamada *et. al.* was adopted.1 An ice-cold mixture of 20% oleum (120 mL) and 70% nitric acid (60 mL) was slowly added to 1,10-phenanthroline monohydrate (12.01 g, 0.067 mmol) and potassium bromide (12.02 g, 0.1010 mmol). The orange-yellow mixture was heated at reflux (85 C) for 3 hrs. The hot yellow solution was then poured over ice and neutralised using a saturated solution of sodium hydroxide. The solution was then filtered, extracted with CH2Cl2 and evaporated to dryness. Recrystallisation from hot ethanol, yielded yellow needle-like crystals (8.680 g, 0.0413 mmol, 62% yield).
2. **Complexation to form *fac*-(1,10-phenanthroline-5,6-dione)Re(CO)3Cl.** The preparation described by Stoeffler *et. al.* was adopted.2 A suspension of Re(CO)5Cl (4.60 g, 12.74 mmol) and 1,10-phenanthroline-5,6-dione (2.52 g, 12.00 mmol) in toluene (250 mL) was stirred at reflux (100 C) under Ar for 4 hrs. Precipitation of a brown microcrystalline solid was observed on cooling. This was collected by suction filtration and purified by column chromatography on silica gel eluted with THF to give *fac*-(1,10-phenanthroline-5,6-dione)Re(CO)3Cl (6.09 g, 11.83 mmol, 83% yield) as a deep red-orange solid.
3. **Schiff-base condensation to form *fac*-(dppz-12-NO2)Re(CO)3Cl.** The method employed was detailed by Waterland *et. al*.3 A solution of *fac*-(1,10-phenanthroline-5,6-dione)Re(CO)3Cl (2.15 g, 4.18 mmol) was reacted with 1.2 equivalents of 4-nitro-1,2-diaminobenzene (0.72 g 4.69 mmol) in refluxing ethanol (250 mL) for 2 hrs. The resultant deep red-orange solution was cooled to 0 C to give *fac*-(dppz-12-NO2)Re(CO)3Cl (2.11 g, 3.34 mmol, 80% yield) as a red-brown precipitate which was collected by suction filtration and dried under vacuum.
4. **Ligand exchange to form *fac*-[(dppz-12-NO2)Re(CO)3(4-Me2Npy)]+[PF6]-.** The preparation employed was adapted from the method described by Stoeffler *et. al.*2 *fac*-(dppz-12-NO2)Re(CO)3Cl (1.026g, 1.623 mmol) was dissolved in DMF (170 mL) and the solution was purged with Ar and heated to 50 C. AgPF6 (1.630 g, 6.468 mmol) was added and after five minutes, a 10-fold excess of 4-dimethylaminopyridine (1.927 g, 15.795 mmol) in DMF (15 mL) was added. The mixture was heated to 70 C for 6 hrs. The deep brown solution was allowed to cool and filtered to remove the AgCl precipitate. The solvent was removed and the red-brown solid purified by chromatography on silica gel eluted with MeCN:CH2Cl2 (25:75 v/v). The product obtained was recrystallised from Et2O/MeCN to give *fac*-[(dppz-12-NO2)Re(CO)3(4-Me2Npy)]+[PF6]- (1.00 g, 1.152 mmol, 71% yield) as a fine deep red solid.

**Product Characterisation**

*Selected spectroscopic data for fac*-[(dppz-12-NO2)Re(CO)3(4-Me2Npy)]+[PF6]-:

**1H NMR** (300MHz, CD3CN, 298 K)  9.98 (dd, 2H), 9.52 (dd, 2H), 9.32 (d, 1H), 8.74 (dd, 1H), 8.63 (d, 1H), 8.25 (m, 1H), 7.62 (dd, 2H), 6.34 (d, 2H), 1.34 (s, 6H).

**positive ion FAB-MS:** ion clusters at *m/z* 720 [(dppz-12-NO2)Re(CO)3(4-Me2Npy)]+, 704 [(dppz-12-NO)Re(CO)3(4-Me2Npy)]+, 664 [(dppz-12-NO)Re(CO)(4-Me2Npy)]+, 598 [(dppz-12-NO2)Re(CO)3]+.

**elemental analysis:** calculated C(38.89%), H(2.21%), N(11.34%); found C(38.19%), H(2.22%), N(10.75%).

**Brief description of ps-TRIR experiments4**

The ps-TRIR experiments were carried out at the Central Laser Facility of the Rutherford Appleton Laboratory. Briefly, part of the output from a 1 kHz, 800 nm, 150 fs, 2 mJ Ti:Sapphire oscillator/regenerative amplifier was used to pump a white light continuum seeded BBO OPA. The signal and idler produced by this OPA were difference frequency mixed in a type I AgGaS2 crystal to generate tuneable mid-infrared pulses (ca. 150 cm‑1 FWHM, 1 J). Second harmonic generation of the residual 800 nm light provided 400 nm pulses, which were used to excite the sample. Changes in infrared absorption were recorded by normalising the outputs from a pair of 64-element HgCdTe linear array detectors on a shot-by-shot basis.

**Notes and References**

M. Yamada, Y. Tanaka, Y. Yoshimoto, S. Kuroda and I. Shimao, *Bull. Chem. Soc. Jpn*., 1992, **65**, 1006.

H. D. Stoeffler, N. B. Thornton, S. L. Temkin and K. S. Schanze, *J. Am. Chem. Soc*., 1995, **117**, 7119.

M. R. Waterland, K. C. Gordon, J. J. McGarvey and P. M. Jayaweera, *J. Chem. Soc., Dalton Trans*.,1998, 609.

Full details will be available in a future publication.
